1 **Three-dimensional Genome Structure Reveals Distinct Chromatin Signatures of**  
2 **Mouse Female Germline Stem Cells During Development**

3 Geng G. Tian<sup>1,9</sup>, Xinyan Zhao<sup>2,9</sup>, Wenhai Xie<sup>3</sup>, Xiaoyong Li<sup>1</sup>, Changliang Hou<sup>1</sup>,  
4 Yinjuan Wang<sup>1</sup>, Lijuan Wang<sup>3</sup>, Xiaodong Zhao<sup>4</sup>, Hua Li<sup>5</sup>, Jing Li<sup>6,\*</sup>,  
5 and Ji Wu<sup>1, 2, 7, 8,\*</sup>

6  
7 <sup>1</sup>Renji Hospital, Key Laboratory for the Genetics of Developmental &  
8 Neuropsychiatric Disorders (Ministry of Education), Bio-X Institutes, School of  
9 Medicine, Shanghai Jiao Tong University, Shanghai 200240, China

10 <sup>2</sup>Key Laboratory of Fertility Preservation and Maintenance of Ministry of Education,  
11 Ningxia Medical University, Yinchuan 750004, China

12 <sup>3</sup>School of Life Sciences, Shandong University of Technology, No.266 Xincun Road,  
13 Zibo, Shandong 255000, China.

14 <sup>4</sup>Shanghai Center for Systems Biomedicine, Shanghai Jiao Tong University, Shanghai  
15 200240, China

16 <sup>5</sup>State Key laboratory for Oncogenes and Bio-ID Center, School of Biomedical  
17 Engineering, Shanghai Jiao Tong University, 800 Dongchuan Road, Shanghai 200240,  
18 China

19 <sup>6</sup>Department of Bioinformatics and Biostatistics, School of Life Sciences and  
20 Biotechnology, Shanghai Jiao Tong University, 800 Dongchuan Road, Shanghai  
21 200240, China

22 <sup>7</sup>Shanghai Key Laboratory of Reproductive Medicine, Shanghai 200025, China

23 <sup>8</sup> Lead Contact

24 <sup>9</sup> These authors contributed equally

25 \* Correspondence: [jiwu@sjtu.edu.cn](mailto:jiwu@sjtu.edu.cn) (W. J), [jing.li@sjtu.edu.cn](mailto:jing.li@sjtu.edu.cn)

26

## 27 **SUMMARY**

28 The three-dimensional configuration of the genome ensures cell-type-specific gene  
29 expression profiles by placing genes and regulatory elements in close spatial  
30 proximity. Here, we revealed the distinct features of the chromatin architecture in  
31 female germline stem cells (FGSCs) by *in situ* high-throughput chromosome  
32 conformation analysis. We also showed that the X chromosome structures were  
33 similar in spermatogonial stem cells and FGSCs. Using integrative analysis of the  
34 three-dimensional chromatin structure, we observed that the TADs were attenuated in  
35 germinal vesicle oocytes and disappeared in metaphase II oocytes during FGSC  
36 development. Finally, we identified conserved compartments belonging to the  
37 paternal/maternal genomes during early embryonic development, which were related  
38 to imprinted genes. These results will provide a valuable resource for studying and  
39 further our understanding of the fundamental characteristics of oogenesis and early  
40 embryo development.

41

## 42 **INTRODUCTION**

43 The chromatin architecture of germline stem cells (GSCs) carries the information  
44 necessary for the cells to exert their unique functions, and is thus an essential factor in

45 the transmission of the genome from generation to generation. GSCs can renew  
46 themselves and differentiate into gametes, including sperm and metaphase II (MII)  
47 oocytes<sup>1-3</sup>. During this process, spermatogonial stem cells (SSCs) differentiate into  
48 sperm by packaging the chromatin into a highly condensed configuration. Recent  
49 identified female GSCs (FGSCs) in postnatal ovaries were shown to differentiate into  
50 MII oocytes after transplantation into the ovaries of infertile mice<sup>4-10</sup>, thus reshaping  
51 the idea that female mammals lose the ability to produce oocytes at birth<sup>11,12</sup>. Unlike  
52 other stem cells, GSCs can undergo meiosis to produce haploid gametes with  
53 chromatin remodeling. It is therefore necessary to characterize the chromatin structure  
54 of GSCs during their development to further our understanding of GSC biology.

55 High-throughput chromosome conformation (Hi-C) is a powerful technology for  
56 studying the genome-wide architecture, allowing the high-order chromatin structure to  
57 be displayed and revealing the chromatin organization in the nucleus<sup>13</sup>. The spatial  
58 organization of chromatin, as the structural and functional basis of the genome, can  
59 affect DNA localization, with important roles in gene transcription, the prevention of  
60 DNA damage, and ensuring DNA duplication and other biological processes<sup>14,15</sup>.  
61 Previous studies reported that the chromatin architecture changed dynamically during  
62 spermatogenesis, with dissolved and reappeared topologically associated domains  
63 (TADs) and A/B compartments<sup>16,17</sup>. However, the signature of the chromatin  
64 architecture during the development of FGSCs is unknown. Furthermore, the paternal  
65 and maternal chromatin architectures have been shown differences during early  
66 embryonic development<sup>18,19</sup>, but the respective changes in high-order allelic genome

67 structure in early embryonic development remain to be explored.

68 In this study, we used *in situ* Hi-C technology to compared the chromatin  
69 organization of FGSCs with pluripotent stem cells (induced pluripotent stem cells,  
70 iPSCs), adult stem cells (ASCs) including SSCs and neural stem cells (NSCs), and  
71 somatic cells (mouse SIM embryonic fibroblast cells, STOs) to explore the  
72 chromosome structure character of FGSCs. Together with RNA sequencing  
73 (RNA-Seq) and chromatin immunoprecipitation sequencing (ChIP-Seq), we identified  
74 the distinct features of chromatin organization in FGSCs at three major levels: A/B  
75 compartments, TADs, and chromatin loops, and demonstrated that FGSCs were most  
76 similar to other ASCs, and largely different from iPSCs and STOs. We also identified  
77 similarities in X chromosomes between SSCs and FGSCs by principal component  
78 analysis of the X chromosome. Further analysis of Hi-C data during female germline  
79 cell development showed that TADs were attenuated but still present in germinal  
80 vesicle (GV) oocytes, disappeared in MII oocytes. Finally, we found conserved  
81 compartment regions in the paternal/maternal genomes in early embryonic  
82 development, related to imprinted genes. Together , these findings revealed the unique  
83 chromatin signature of FGSCs, and presented a whole landscape of high-order  
84 genome structure during development of female germline cells and early embryos.

85

## 86 **RESULTS**

### 87 **Biological Characterization of FGSCs and Other ASCs**

88 FGSCs were isolated and cultured from the ovaries of Ddx4-Cre;mT/mG neonatal

89 mice, as described previously <sup>20</sup>. After culture for at least 18 passages, the cells  
90 exhibited a characteristic morphology similar to that previously described for FGSCs  
91 <sup>2,20</sup>. The expression of female germline marker genes was determined by  
92 reverse-transcription polymerase chain reaction (RT-PCR). FGSCs after long-term  
93 culture expressed *Oct4*, *Fragilis*, *Mvh* (mouse vasa homologue, expressed exclusively  
94 in germ cells), *Stella*, *Gfra1*, and *Dazl* genes. Furthermore, immunofluorescence  
95 analysis revealed that these cells also expressed MVH, confirming their identity as  
96 FGSCs (Figure 1A).

97 We isolated and cultured SSCs from the testes of 6-day-old DBA/2×CAG-EGFP  
98 F<sub>1</sub> mice, as described previously <sup>21</sup>. Long-term cultured SSCs (>20 passages) were  
99 assessed by RT-PCR and were shown to express male germline marker genes (*Etv5*,  
100 *Oct4*, *Plzf* (promyelocytic leukaemia zinc finger), *Gfra1*, and *Mvh*). These results  
101 were confirmed by immunofluorescence and most of the cultured cells were also  
102 positive for PLZF expression, confirming their identity as SSCs (Figure 1B).

103 Isolated primary NSCs could self-proliferate and be cultured for 5–8 passages in  
104 NSC proliferation medium. Morphologically, cultured NSCs were spindle-shaped  
105 with a high nucleus-to-cytoplasm ratio, as reported previously <sup>22</sup>. The cultured NSCs  
106 were positive for several NSC-specific markers including *Nestin*, *Sox2*, *Pax6*, *Olig2*,  
107 and *Ascl1*, as determined by RT-PCR. Immunocytochemical staining confirmed that  
108 most of the cultured NSCs were positive for NESTIN and SOX2, as typical markers  
109 specific for NSCs. Following the removal of epidermal growth factor and basic  
110 fibroblast growth factor from the medium, NSCs spontaneously differentiated into

111 neurons and astrocytes, characterized by prominent dendrites with long axons and by  
112 extensive cytoplasm with thick processes, respectively. The differentiation potential of  
113 cultured NSCs was confirmed by immunochemical staining of the neural- and  
114 astrocyte-specific markers TUJ-1 ( $\beta$ 3 Tubulin) and GFAP (glial fibrillary acidic  
115 protein). These results confirmed the identity of the cultured cells as NSCs (Figure  
116 1C). The morphology of STOs is shown in Figure 1D.

117

### 118 **Global Chromosome Organization Map in FGSCs**

119 To study the signature of the chromatin architecture in FGSCs, we performed *in situ*  
120 Hi-C<sup>23</sup> with two biological replicates of FGSCs and other cells (SSCs, NSCs, iPSCs  
121 and STOs) generating approximately 400 million reads for each replicate. After  
122 filtering artificial reads and normalization, we obtained a total of over 2 billion valid  
123 Hi-C reads, including an average of 1 billion long-range (>20 kb) intra-chromosomal  
124 *cis* contacts and 400 million inter-chromosomal *trans* contacts (Table S1). We  
125 confirmed the high reproducibility of the Hi-C data (Figure S1) and combined the two  
126 biological replicates into a single set of merged Hi-C data per cell type, to reach a  
127 maximum resolution of 20 kb.

128 Analysis of the Hi-C data showed that the high-order chromatin organization of  
129 the whole genome in FGSCs differed from that in the other cells (Figure S2). An  
130 overview of the intra-chromosomal contact heat maps revealed that FGSCs displayed  
131 a distinct chromatin organization (Figure 2A). We further examined the characteristics  
132 of the chromatin organization by analyzing the patterns of compartment status and

133 TADs in the autosomes across cells, avoiding sex chromosome effects. The  
134 compartment status was classified as active (A) or inactive (B) (Table S2). FGSCs  
135 were more similar to SSCs and NSCs in terms of A/B compartments, compared with  
136 iPSCs and STOs (Figure 2B), suggesting that FGSCs were ASCs. The patterns of  
137 TADs and directional indexes (DI) were almost the same for these cells (Figure 2B).  
138 We counted the numbers of compartments and TADs in the cells and showed that  
139 FGSCs had the lowest number of TADs, and the number of compartments was similar  
140 to that in SSCs (Figure 2C and Table S3). We also calculated the average  
141 intra-chromosomal contact probability of cells and found that the chromatin  
142 interaction frequency decreased monotonically from  $10^5$  to  $10^8$  bp for FGSCs and the  
143 other cells (Figure 2D). The contact probability curves were similar in five cell types  
144 from  $10^5$  to  $10^{6.5}$  bp, but changes occurred at long-distance genome, as reported  
145 previously<sup>18</sup>.

146

#### 147 **FGSCs Exhibited Distinct Compartment Status**

148 Systematic analysis of the compartment status in FGSCs showed that genes had  
149 higher expression levels in compartment A than in compartment B (Figure S3A),  
150 indicating that compartment status was correlated with gene expression. Combining  
151 with the ChIP-Seq data analysis, we observed that H3K27ac and H3K4me3 were  
152 highly correlated with compartment status (Figure S3B). The genome browser  
153 showed that H3K27ac was highly enriched in compartment A but not in compartment  
154 B (Figure S3C). By k-means clustering of the compartment status in FGSCs

155 compared with other cells, we obtained activate and inactive compartments of FGSCs  
156 (Figure 3A). Furthermore, switching compartments of FGSCs accounted for a high  
157 proportion (about 50%) of the total number in the genome compared with iPSCs and  
158 STOs, but a smaller proportion (about 30%–40%) compared with SSCs and NSCs  
159 (Figure S4A). These results suggested that FGSCs had a unique A/B compartment  
160 status that was more similar to other ASCs than to iPSCs or STOs. Additional  
161 RNA-Seq data revealed that the genes located in the switching compartment tended to  
162 be significantly differentially expressed compared with the stable compartments  
163 (Figure 3B). This was consistent with ChIP-Seq signal results, which showed  
164 dramatic differences of H3K27ac and H3K4me3 enrichment in the switching  
165 compartment compared with the stable compartment (Figure S4B). By calculating the  
166 covariation between gene expression and compartment status, we identified a subset  
167 of 1206 genes that were highly correlated with compartment status (Table S4). Gene  
168 Ontology (GO) analysis showed that these genes were particularly associated with  
169 stem cell population maintenance and cell proliferation (Figure S4C). Among these,  
170 *Coprs*, as an ASC marker located in the A compartment of FGSCs, SSCs, and NSCs,  
171 showed higher expression than in iPSCs in which it was located in the B compartment,  
172 consistent with a previous report<sup>24</sup> (Figure 3C). In addition, *Nanog* as a pluripotent  
173 stem cell marker, showed higher expression in iPSCs, being located in the A  
174 compartment in iPSCs while switching to the B compartment in other types of cells  
175 (Figure 3C). These findings suggested that FGSCs had a unique compartment status  
176 characteristic of ASCs, which could work together with histone modification to



177 regulate gene expression to determine their features.

178 We then identified the TADs in FGSCs using DI (Table S3). Well-defined TADs  
179 were conserved in ~90% of the genome across cell types (Figure 3D). We classified  
180 the TADs into five types: stable, merge, split, rearrangement, and unique. Most of the  
181 TADs belonged to the stable type (Figure 3E), suggesting that TAD structure was  
182 highly stable across all five types of cells, in accordance with a previous report<sup>25</sup>.  
183 However, the absolute DI showed that the strength of the TADs differed between  
184 FGSCs and the other cells (Figure S5A), suggesting that, although TAD domains were  
185 stable, FGSCs had a distinct frequency of intra-TAD interactions. We further explored  
186 the relationship between TADs and gene expression, and observed that gene  
187 expression was higher in TAD boundaries than in TADs in FGSCs and other cells  
188 (Figure 3F), illustrating that genes were more activated in these TAD boundaries  
189 (Figure S5B). We classified the boundaries into cell-type-specific and common  
190 boundaries, and identified 417, 369, 286, 263, and 48 cell-type-specific boundaries  
191 and 833 common boundaries, suggesting that most boundaries were stable across cell  
192 types. Further study of the relationship between cell-type-specific boundaries and  
193 gene expression indicated that gene expression changed significantly between specific  
194 and common boundaries (Figure S5C). These results revealed that FGSCs had stable  
195 TADs, but that gene expression was activated in the TAD boundary.

196

### 197 **Cell-type-specific Chromatin Loops Revealed FGSC Signature**

198 We systematically analyzed the chromatin loops and identified 4832, 1906, 7004,

199 3060, and 6951 chromatin loops in FGSCs, SSCs, NSCs, iPSCs and STOs,  
200 respectively. Using a Venn diagram, we observed that only a few (n=177) chromatin  
201 loops were shared across all cell types (cell-type shared loops) (Figure 4A),  
202 suggesting that most chromatin loops were cell-type-specific and that FGSCs had  
203 distinct chromatin loops. Furthermore, genes located in these cell-type-specific loops  
204 were highly enriched in cell-type-related GO categories (Figure 4B). For instance,  
205 *Sox17*, as a transcription factor involved in embryonic development <sup>26</sup>, formed  
206 chromatin loops in iPSCs but gradually disappeared in FGSCs, SSCs, NSCs, and  
207 STOs, which was also most highly expressed in iPSCs (Figure S6A), suggesting that  
208 its expression could be regulated by *cis* regulation of the chromatin loops. Based on  
209 previous results, both A/B compartment status and TADs could affect gene expression  
210 <sup>27,28</sup>. We therefore investigated if the formation of cell-type-specific chromatin loops  
211 was related to compartment A/B status or to TADs, and found that 60% of  
212 cell-type-specific loops were commonly localized in the switching compartments  
213 (Figure S6B), while about 30% were localized in the stable TAD type (Figure S6C).  
214 This suggested that the chromatin loops relied more on compartment switching to  
215 regulate gene expression, and were not dependent on TAD type to exert their function.

216 We further examined the specific chromatin loops in FGSCs as GSCs by  
217 comparing them with the loops in SSCs using ChIP-Seq data. K-means clustering of  
218 ChIP-Seq signals identified four major classes on active promoter (H3K4me3) and  
219 enhancer (H3K27ac) sites (Figure 4C). Cluster 4 of active promoters and most of the  
220 active enhancers were obviously different between FGSCs and SSCs (Figure 4C).

221 Meanwhile, GO enrichment analysis further revealed that specific loops with different  
222 active promoters and enhancers were enriched in reproductive processes such as sex  
223 differentiation, sexual reproduction, and reproductive development (Fisher's exact test,  
224  $P < 0.05$ ; Figure S7). We divided these loops into two subsets: FGSCs lost and FGSCs  
225 gained (Figure 4D). *Dmrt1*, as a conserved transcriptional regulator in male germ cells  
226 required for the maintenance and replenishment of SSCs<sup>29</sup>, was looped in SSCs but  
227 not in FGSCs. *Hif1an*, as a heterodimeric transcription factor related to interface with  
228 stem cell signaling pathways<sup>30</sup>, gained loops in FGSCs and could be related to female  
229 germline cell development (Figure 4D). Overall, these findings indicated that FGSCs  
230 possessed cell-type-specific chromatin loops that provided the spatial space for  
231 histone modification to regulate gene expression.

232

### 233 **X-Chromosome Structure Was Similar Between SSCs and FGSCs**

234 One female X chromosomes is randomly inactivated during mammalian development  
235 to ensure matched dosages in males and females<sup>31</sup>. To dissect the high-order  
236 organization of the X chromosome in SSCs and FGSCs, we performed Pearson's  
237 correlation analysis of the Hi-C matrix in the X chromosome. The results showed that  
238 SSCs and FGSCs had a strong correlation (Figure 5A). Furthermore, upon extracting  
239 the eigenvectors of the whole chromosome interactions and using the first principal  
240 component (PC1) score to compare the structure of the X chromosome in SSCs and  
241 FGSCs, we found that the X chromosome was more similar (correlation = 0.87) than  
242 the autosomes (mean correlation = 0.21) between SSCs and FGSCs (Figure 5B and

243 Figure S8). By analyzing the PC1 score of the X chromosome in FGSCs, SSCs, and  
244 female embryonic stem cells (fESCs), considering that fESCs have two activated X  
245 chromosomes (Xa), we observed that FGSCs were more highly correlated with SSCs  
246 than with fESCs in the X chromosome (Figure 5C). This suggested that the X  
247 chromosome is similar between SSCs and FGSCs, probably due to one of the X  
248 chromosomes being inactivated (Xi) in FGSCs <sup>32,33</sup>.

249 To identify the difference between the active X chromosome and the inactive one,  
250 we deconvoluted the respective Hi-C data of these chromosomes from FGSCs (Figure  
251 5D). As expected, we visualized that the X chromosome was separated by a region  
252 containing the DXZ4 macrosatellite (which reportedly plays a crucial role in shaping  
253 Xi-chromosome structure) into two parts in FGSCs <sup>34</sup>, as well as in deconvoluted Xi,  
254 whereas this was not the case in SSCs (Figure 5D). This demonstrated that one of the  
255 X chromosomes in FGSCs was inactivated. Deconvoluted Xi displayed that the  
256 long-range contacts were attenuated for intra-TADs and inter-TADs (Figure 5D),  
257 consistent with a previous report <sup>32,33</sup>. We next investigated the structure of the region  
258 containing Xist, which is a key factor for inactivation of the X chromosome. Notably,  
259 FGSCs were similar to SSCs in the Xist region, while in deconvoluted Xi it was  
260 shown that the Xist region lost most long-range contacts and retained a sub-TAD-like  
261 structure (Figure 5E), in support of a previous report <sup>32</sup>. Taken together, our data  
262 suggested that one of the X chromosomes was inactivated in FGSCs, to maintain  
263 relative consistency with SSCs to balance the gene expression between males and  
264 females.

265

266 **TADs Were Attenuated and then Disappeared During Female Germline Cell**

267 **Development**

268 FGSCs are derived from primordial germ cells and undergo meiosis into GV oocytes,

269 and then to MII oocytes. To explore the dynamic changes of TADs during female

270 germline cell development, we applied Hi-C to obtain the data of whole genome of

271 chromatin architecture in mouse GV oocytes (Figure S9). After analysis of Hi-C data

272 for MII oocytes, zygotes, two-cell embryos, and eight-cell embryos, we observed that

273 TADs were attenuated in GV oocytes, disappeared in MII oocytes, and recovered in

274 two-cell embryos (Figure 6A). A snapshot of TAD signals also showed that the TAD

275 strength was weakened during female germline cell development and reprogramed at

276 early embryonic development (Figure 6B), in contrast to changes in TADs during

277 spermatogenesis<sup>35</sup>.

278 We further examined the changes in TADs during female germline cell

279 development by calculating the DI value, which reflected the degree of interactions of

280 a given bin in upstream or downstream regions and was associated with calling TADs.

281 Expectedly, the DI value was significantly reduced during female germline cell

282 development and reestablished in early embryonic development (Figure 6C).

283 Meanwhile, the insulation score showed that FGSCs had the strongest TAD

284 boundaries, while these were decreased in GV oocytes and weakest in MII oocytes,

285 and gradually increased in early embryonic development (Figure 6D). We further

286 calculated the proportion of *cis*-short interactions (<2 Mb) and *cis*-long interactions

287 (>2 Mb) versus total *cis*-interactions. The relative proportions of *cis*-short interactions  
288 in FGSCs was similar to GV oocytes, lowest in MII oocytes, highest in zygotes, and  
289 then reduced during early embryonic development, with similar interactions in  
290 eight-cell embryos and FGSCs (Figure 6E). Overall, these results demonstrated that  
291 TADs were attenuated and then disappeared during female germ cell development,  
292 and reestablished during early embryonic development (Figure 6F), thus revealing the  
293 pattern of TADs throughout female germ cell and early embryonic development.

294

### 295 **Identification of Conserved Allelic Chromatin Structures**

296 Previous findings have reported the chromatin structure of the maternal genome is  
297 different with the paternal genome during early embryonic development<sup>18,19</sup>. We  
298 aimed to investigate how the conserved structures in these respective genomes  
299 affected their genome organization. Early embryonic Hi-C data were analyzed with  
300 single nucleotide polymorphisms between two mouse strains to track the maternal and  
301 paternal genomes. The correlation of compartment status according to the PC1 score,  
302 showed that the paternal genome was clustered in pachytene spermatocytes (PACs),  
303 sperm, paternal zygotes, and eight-cell embryos, while the maternal genome was  
304 clustered within MII oocytes, maternal zygotes, and eight-cell embryos (Figure 7A),  
305 indicating that the allelic chromatin structure was conserved in early embryonic  
306 development. FGSCs and SSCs, as early-stage germ cells, were clustered together  
307 (Figure 7A). Interestingly, the paternal genome clustered with the maternal genome at  
308 the two-cell embryo stage, but was completely separate at the eight-cell stage,

309 suggesting that the two-cell stage plays an important role in allelic chromatin structure  
310 development, possibly because of the reestablishment of TADs at this stage.  
311 Furthermore, we observed some regions of compartments in allelic genome were  
312 conserved during the early embryonic development (Figure 7B). We then  
313 systematically identified the conserved A/B compartment regions by calculating  
314 Pearson's correlation for the whole genome, with a sliding window of 2 Mb. The  
315 paternal genome had more conserved regions than the maternal genome (Figure 7C),  
316 indicating that the paternal genome was more conserved. Comparing the conserved  
317 regions, some allelic-specific conserved regions were identified by Venn diagrams  
318 (Figure 7D). By enriching for imprinted genes with Fisher's exact test ( $P < 0.05$ ), we  
319 found that the allelic-specific regions were significantly related to imprinted genes  
320 (Table S5) such as *Igf2r*, *Dlk1*, and *Dio3*, which were reported to highly express in  
321 maternal or paternal<sup>36,37</sup>. The results suggested that those imprinted genes were  
322 affected by the allelic-specific conserved region, which could regulate paternal or  
323 maternal development.

324

## 325 **DISCUSSION**

326 Stem cells, including pluripotent stem cells and ASCs, have important implications in  
327 basic biology and regenerative medicine. However, regenerative medicine requires  
328 stem cells to be transplanted safely, with a particular focus on avoiding the  
329 development of cancer. Although gene mutations have been reported to be responsible  
330 for many diseases, including cancer<sup>38,39</sup>, recent studies have revealed that diseases

331 such as cancer can also be caused by disruption of chromatin organization. The  
332 chromatin architecture thus plays crucial roles in preventing DNA damage, in gene  
333 mutation, and in ensuring appropriate gene transcription, DNA duplication, and  
334 developmental processes<sup>40-42</sup>. It is therefore essential that stem cells are characterized  
335 or identified in terms of their chromatin organization before their use in a clinical  
336 context. FGSCs not only have the abilities of self-renewal and differentiation, but are  
337 also responsible for passing on genetic information to the next generation. The  
338 stability of that genetic information is affected by the high-order genome organization  
339<sup>43</sup>.

340 To identify the chromosome structure character of FGSCs, we compared FGSCs  
341 with pluripotent stem cells (iPSCs), ASCs (SSCs and NSCs) and somatic cells (STOs)  
342 by Hi-C technology. The results revealed that FGSCs had a distinct high-order  
343 genome structure in terms of the A/B compartment status, chromatin loops, and TADs.  
344 For further characterization, we identified FGSCs specific activated and repressed  
345 compartment regions, and obtained partially genes highly related with the switch of  
346 FGSCs compartment status. These genes were related to stem cell maintenance and  
347 differentiation pathways, strongly supporting the role of FGSCs as stem cells, with  
348 some shared characteristics with SSCs and NSCs, and belonging to ASCs. Moreover,  
349 FGSC-specific loops, which included active promoters and enhancers, could be  
350 significantly enriched in reproductive-related pathways. Among these, *hiflan*, which  
351 is related to Notch signaling, could be a potential marker for female germline cells.  
352 Our findings indicated that FGSCs belong to ASCs in the high-order organization, and



353 further confirmed the existence of FGSCs, consistent with the previous reports for  
354 cellular and molecular characteristic<sup>4-7,44,45</sup>.

355 Previous studies indicated that both FGSCs and SSCs have their own unique  
356 epigenetic signatures<sup>44,46</sup>. We analyzed and compared the 3D genomic architectures  
357 of FGSCs and SSCs, and revealed that GSCs had their own unique high-order  
358 chromatin organization, especially in terms of A/B compartments and chromatin loops.  
359 Although FGSCs have one more X chromosome than SSCs, the architecture of the X  
360 chromosome in FGSCs was more similar to SSCs than to autosomes, suggesting that  
361 FGSCs maintain a balance of gene expression with SSCs by inactivating one X  
362 chromosome. Furthermore, analysis of the X-chromosome matrix of FGSCs indicated  
363 that it was separated into two domains by a region containing *Dxz4*, which has been  
364 reported to be an essential regulator of X chromosome inactivation<sup>32</sup>. Meanwhile,  
365 deconvoluted Xi data showed that *Xist* was also located in a region showing moderate  
366 interactions with a TAD-like structure, consistent with previous findings<sup>32</sup>. These  
367 results indicate that these differences could reflect Xi, supporting inactivation of one  
368 X chromosome in FGSCs<sup>47</sup>.

369 Interestingly, recent studies reported that the chromatin architecture changed  
370 dynamically during spermatogenesis, with dissolved and then reappeared TADs and  
371 compartments<sup>16,17</sup>. On the contrary, TADs were attenuated and then disappeared in  
372 oogenesis. During early embryonic development, TADs recovered and started to  
373 appear in two-cell embryos, suggesting that this stage could play an essential role in  
374 genome organization, including paternal/maternal chromatin reprogramming. We

375 therefore further analyzed paternal and maternal chromatin structures during early  
376 embryonic development, and found that the paternal genome clustered with the  
377 maternal genome at the two-cell stage, but was completely separate at the eight-cell  
378 stage, consistent with the above results.

379 In conclusion, we present a comprehensive overview of the chromatin  
380 organization of FGSCs to create a rich resource of high-resolution genome-wide maps.  
381 Our findings revealed that the chromatin architecture of FGSCs included unique  
382 features, especially in terms of compartment status and chromatin loops, which may  
383 contribute to their cell-type-specific gene regulation. These data will provide a  
384 valuable resource for future studies of the features of chromatin organization in  
385 mammalian stem cells, with important implications for their role in medical research  
386 and their potential and actual clinical applications.

387

## 388 **EXPERIMENTAL PROCEDURES**

389 Additional information and details regarding this work may be found in the  
390 Supplemental Experimental Procedures.

391

## 392 **ACCESSION NUMBERS**

393 The accession number for the expression and sequencing data reported in this paper is  
394 GEO: GSE126014 and GEO: GSE137771.

395

## 396 **SUPPLEMENTAL INFORMATION**

397 Supplemental Information includes Supplemental Experimental Procedures, eight  
398 figures and four tables and can be found with this article online.

399

#### 400 **AUTHOR CONTRIBUTIONS**

401 T.G.G performed the Hi-C experiments, analyzed the data and wrote the manuscript.  
402 Z.X carried out ChIP-Seq experiments. X.W and W.L performed the NSC culture and  
403 identification. L.X undertook the FGSC culture and identification. W.Y performed the  
404 SSC culture and identification. L.H finished RNA-Seq experiment. H.C did the Hi-C  
405 experiment of GV stage oocyte. W.J and L.J supervised the experiment work and  
406 devised this study.

407

#### 408 **ACKNOWLEDGMENTS**

409 We thank Dr. Kang's lab (Tongji University) for providing the iPSCs cell line. This  
410 work was supported by National Basic Research Program of China  
411 (2018YFC1003501, 2017YFA0504201), National Nature Science Foundation of  
412 China (81720108017, 81501316), the National Major Scientific Instruments and  
413 Equipment Development Project, National Nature Science Foundation of China  
414 (61827814).

415

#### 416 **REFERENCES**

417 1 Brinster, R. L. & Zimmermann, J. W. Spermatogenesis following male  
418 germ-cell transplantation. Proc Natl Acad Sci U S A 91, 11298-11302 (1994).

- 419 2 Zou, K. et al. Production of offspring from a germline stem cell line derived  
420 from neonatal ovaries. *Nature cell biology* 11, 631-636, doi:10.1038/ncb1869  
421 (2009).
- 422 3 Wu, C. et al. Tracing and Characterizing the Development of Transplanted  
423 Female Germline Stem Cells In Vivo. *Molecular therapy : the journal of the*  
424 *American Society of Gene Therapy* 25, 1408-1419,  
425 doi:10.1016/j.ymthe.2017.04.019 (2017).
- 426 4 Zou, K. et al. Production of offspring from a germline stem cell line derived  
427 from neonatal ovaries. *Nature Cell Biology* 11, 631-U424,  
428 doi:10.1038/ncb1869 (2009).
- 429 5 White, Y. A. R. et al. Oocyte formation by mitotically active germ cells  
430 purified from ovaries of reproductive-age women. *Nat Med* 18, 413-U176,  
431 doi:10.1038/nm.2669 (2012).
- 432 6 Ding, X. B. et al. Human GV oocytes generated by mitotically active germ  
433 cells obtained from follicular aspirates. *Sci Rep-Uk* 6, doi:ARTN  
434 2821810.1038/srep28218 (2016).
- 435 7 Wu, C. Q. et al. Tracing and Characterizing the Development of Transplanted  
436 Female Germline Stem Cells In Vivo. *Mol Ther* 25, 1408-1419,  
437 doi:10.1016/j.ymthe.2017.04.019 (2017).
- 438 8 Zhou, L. et al. Production of fat-1 transgenic rats using a post-natal female  
439 germline stem cell line. *Mol Hum Reprod* 20, 271-281,  
440 doi:10.1093/molehr/gat081 (2014).

- 441 9 Lu, Y. Q., He, X. C. & Zheng, P. Decrease in expression of maternal effect  
442 gene Mater is associated with maternal ageing in mice. *Mol Hum Reprod* 22,  
443 252-260, doi:10.1093/molehr/gaw001 (2016).
- 444 10 Liu, J. et al. Isolation and characterization of string-forming female germline  
445 stem cells from ovaries of neonatal mice. *Journal of Biological Chemistry* 292,  
446 16003-16013, doi:10.1074/jbc.M117.799403 (2017).
- 447 11 Zuckerman, S. J. R. P. i. H. R. The number of oocytes in the mature ovary. 6,  
448 63-109 (1951).
- 449 12 Borum, K. J. E. c. r. Oogenesis in the mouse: a study of the meiotic prophase.  
450 24, 495-507 (1961).
- 451 13 Lieberman-Aiden, E. et al. Comprehensive mapping of long-range interactions  
452 reveals folding principles of the human genome. *Science* 326, 289-293,  
453 doi:10.1126/science.1181369 (2009).
- 454 14 Smallwood, A. & Ren, B. Genome organization and long-range regulation of  
455 gene expression by enhancers. *Current opinion in cell biology* 25, 387-394,  
456 doi:10.1016/j.ceb.2013.02.005 (2013).
- 457 15 Gorkin, D. U., Leung, D. & Ren, B. The 3D Genome in Transcriptional  
458 Regulation and Pluripotency. *Cell Stem Cell* 14, 762-775,  
459 doi:10.1016/j.stem.2014.05.017 (2014).
- 460 16 Wang, Y. et al. Reprogramming of Meiotic Chromatin Architecture during  
461 Spermatogenesis. *Mol Cell* 73, 547-561 e546,  
462 doi:10.1016/j.molcel.2018.11.019 (2019).

- 463 17 Vara, C. et al. Three-Dimensional Genomic Structure and Cohesin Occupancy  
464 Correlate with Transcriptional Activity during Spermatogenesis. *Cell Reports*  
465 28, 352-+, doi:10.1016/j.celrep.2019.06.037 (2019).
- 466 18 Du, Z. et al. Allelic reprogramming of 3D chromatin architecture during early  
467 mammalian development. *Nature* 547, 232-235, doi:10.1038/nature23263  
468 (2017).
- 469 19 Ke, Y. et al. 3D Chromatin Structures of Mature Gametes and Structural  
470 Reprogramming during Mammalian Embryogenesis. *Cell* 170, 367-381 e320,  
471 doi:10.1016/j.cell.2017.06.029 (2017).
- 472 20 Zhang, C. & Wu, J. Production of offspring from a germline stem cell line  
473 derived from prepubertal ovaries of germline reporter mice. *Molecular human*  
474 *reproduction* 22, 457-464, doi:10.1093/molehr/gaw030 (2016).
- 475 21 Gong, X., Xie, H., Li, X., Wu, J. & Lin, Y. Bisphenol A induced apoptosis and  
476 transcriptome differences of spermatogonial stem cells in vitro. *Acta*  
477 *biochimica et biophysica Sinica* 49, 780-791, doi:10.1093/abbs/gmx075  
478 (2017).
- 479 22 Weixiang, G., Patzlaff, N. E., Jobe, E. M. & Xinyu, Z. Isolation of multipotent  
480 neural stem or progenitor cells from both the dentate gyrus and subventricular  
481 zone of a single adult mouse. *Nature protocols* 7, 2005 (2012).
- 482 23 Rao, S. S. P. et al. A 3D Map of the Human Genome at Kilobase Resolution  
483 Reveals Principles of Chromatin Looping. *Cell* 159, 1665-1680,  
484 doi:10.1016/j.cell.2014.11.021 (2014).

- 485 24 Xie, W., Wang, H. & Wu, J. Similar morphological and molecular signatures  
486 shared by female and male germline stem cells. *Sci Rep* 4, 5580,  
487 doi:10.1038/srep05580 (2014).
- 488 25 Dixon, J. R. et al. Topological domains in mammalian genomes identified by  
489 analysis of chromatin interactions. *Nature* 485, 376-380,  
490 doi:10.1038/nature11082 (2012).
- 491 26 Kim, I., Saunders, T. L. & Morrison, S. J. Sox17 dependence distinguishes the  
492 transcriptional regulation of fetal from adult hematopoietic stem cells. *Cell*  
493 130, 470-483, doi:10.1016/j.cell.2007.06.011 (2007).
- 494 27 Dixon, J. R. et al. Chromatin architecture reorganization during stem cell  
495 differentiation. *Nature* 518, 331-336, doi:10.1038/nature14222 (2015).
- 496 28 Bonev, B. et al. Multiscale 3D Genome Rewiring during Mouse Neural  
497 Development. *Cell* 171, 557-572 e524, doi:10.1016/j.cell.2017.09.043 (2017).
- 498 29 Zhang, T., Oatley, J., Bardwell, V. J. & Zarkower, D. DMRT1 Is Required for  
499 Mouse Spermatogonial Stem Cell Maintenance and Replenishment. *Plos*  
500 *Genet* 12, doi:ARTN e100629310.1371/journal.pgen.1006293 (2016).
- 501 30 Simon, M. C. & Keith, B. The role of oxygen availability in embryonic  
502 development and stem cell function. *Nat Rev Mol Cell Bio* 9, 285-296,  
503 doi:10.1038/nrm2354 (2008).
- 504 31 Huynh, K. D. & Lee, J. T. X-chromosome inactivation: a hypothesis linking  
505 ontogeny and phylogeny. *Nature reviews. Genetics* 6, 410-418,  
506 doi:10.1038/nrg1604 (2005).

- 507 32 Giorgetti, L. et al. Structural organization of the inactive X chromosome in the  
508 mouse. *Nature* 535, 575-579, doi:10.1038/nature18589 (2016).
- 509 33 Nora, E. P. et al. Spatial partitioning of the regulatory landscape of the  
510 X-inactivation centre. *Nature* 485, 381-385, doi:10.1038/nature11049 (2012).
- 511 34 Deng, X. et al. Bipartite structure of the inactive mouse X chromosome.  
512 *Genome biology* 16, 152, doi:10.1186/s13059-015-0728-8 (2015).
- 513 35 Wang, Y. et al. Reprogramming of Meiotic Chromatin Architecture during  
514 Spermatogenesis. *Molecular Cell* 73, 547-+, doi:10.1016/j.molcel.2018.11.019  
515 (2019).
- 516 36 Da Rocha, S. T., Edwards, C. A., Ito, M., Ogata, T. & Ferguson-Smith, A. C.  
517 Genomic imprinting at the mammalian Dlk1-Dio3 domain. *Trends in Genetics*  
518 24, 306-316, doi:10.1016/j.tig.2008.03.011 (2008).
- 519 37 Birger, Y., Shemer, R., Perk, J. & Razin, A. The imprinting box of the mouse  
520 *Igf2r* gene. *Nature* 397, 84-88, doi:Doi 10.1038/16291 (1999).
- 521 38 Vogelstein, B. et al. Cancer genome landscapes. *Science* 339, 1546-1558,  
522 doi:10.1126/science.1235122 (2013).
- 523 39 Cooper, D. N. et al. Genes, Mutations, and Human Inherited Disease at the  
524 Dawn of the Age of Personalized Genomics. *Hum Mutat* 31, 631-655,  
525 doi:10.1002/humu.21260 (2010).
- 526 40 Lupianez, D. G. et al. Disruptions of Topological Chromatin Domains Cause  
527 Pathogenic Rewiring of Gene-Enhancer Interactions. *Cell* 161, 1012-1025,  
528 doi:10.1016/j.cell.2015.04.004 (2015).



- 529 41 Hnisz, D. et al. Activation of proto-oncogenes by disruption of chromosome  
530 neighborhoods. *Science* 351, 1454-1458, doi:10.1126/science.aad9024 (2016).
- 531 42 Franke, M. et al. Formation of new chromatin domains determines  
532 pathogenicity of genomic duplications. *Nature* 538, 265-269,  
533 doi:10.1038/nature19800 (2016).
- 534 43 Battulin, N. et al. Comparison of the three-dimensional organization of sperm  
535 and fibroblast genomes using the Hi-C approach. *Genome Biol* 16, 77,  
536 doi:10.1186/s13059-015-0642-0 (2015).
- 537 44 Zhang, X. L. et al. Integrative epigenomic analysis reveals unique epigenetic  
538 signatures involved in unipotency of mouse female germline stem cells.  
539 *Genome Biol* 17, 162, doi:10.1186/s13059-016-1023-z (2016).
- 540 45 Ma, B. et al. Molecular characteristics of early-stage female germ cells  
541 revealed by RNA sequencing of low-input cells and analysis of genome-wide  
542 DNA methylation. *DNA Res* 26, 105-117, doi:10.1093/dnares/dsy042 (2019).
- 543 46 Hammoud, S. S. et al. Chromatin and transcription transitions of mammalian  
544 adult germline stem cells and spermatogenesis. *Cell Stem Cell* 15, 239-253,  
545 doi:10.1016/j.stem.2014.04.006 (2014).
- 546 47 Li, X. et al. Dosage compensation in the process of inactivation/reactivation  
547 during both germ cell development and early embryogenesis in mouse. *Sci*  
548 *Rep* 7, 3729, doi:10.1038/s41598-017-03829-z (2017).

549

550

551 **Figure Legends**

552 **Figure 1. Morphology and biological characteristics of FGSCs and other ASCs**

553 (A) Morphology and biological characteristics of FGSCs. (I) Representative  
554 morphology of cultured FGSCs (>18 passages) from Ddx4-Cre;mT/mG mice. (II)  
555 Representative field under UV light for FGSCs with GFP expression. (III) Merged  
556 images from I and II. Bar=25  $\mu$ m. (IV) RT-PCR analysis of female germline markers.  
557 Marker, 100-bp DNA markers. (V–VIII) Immunofluorescence of FGSCs for GFP (V),  
558 MVH (VI), DAPI (VII), and merged (VIII). Bar=10  $\mu$ m.

559 (B) Morphology and biological characteristics of SSCs. (I) Representative view of  
560 cultured SSCs (>20 passages) from CAG-EGFP mice. (II) Representative image  
561 under UV light for SSCs with GFP expression. (III) Merged images from I and II.  
562 Bar=25  $\mu$ m. (IV) RT-PCR analysis of male germline markers. Marker, 100-bp DNA  
563 markers. (V–VIII) Immunofluorescence of SSCs for GFP (V), PLZF (VI), DAPI (VII),  
564 and merged (VIII). Bar=50  $\mu$ m.

565 (C) Morphology and biological characteristics of NSCs. (I) Representative  
566 morphology of cultured NSCs. (II) Representative view of differentiated NSCs *in*  
567 *vitro*. Bar=10  $\mu$ m. (III) RT-PCR analysis of NSC markers. Marker, 100-bp DNA  
568 markers. (V–VIII) Immunofluorescence of NSCs for Nestin (V), SOX2 (VI), DAPI  
569 (VII), and merged (VIII). (IX–XII) Immunofluorescence of differentiated NCs for  
570 TUJ-1 (IX), GFAP (X), DAPI (XI), and merged (XII). Bar=10  $\mu$ m.

571 (D) Representative morphology of cultured STOs. Bar=10  $\mu$ m.

572

573 **Figure 2. Overall chromosome structure in FGSCs**

574 (A) Contact matrices from chromosome 19 in FGSCs, SSCs, NSCs, iPSCs and STOs.  
575 (B) First principal component (PC1) value, normalized Hi-C interaction heat maps,  
576 and directional indexes (DIs) in FGSCs and other cells at 20-kb resolution. PC1 value  
577 was used to indicate A/B compartment status, where a positive PC1 value represented  
578 the A compartment (blue) and a negative one represented the B compartment  
579 (yellow).  
580 (C) Numbers of identified A/B compartments and TADs in FGSCs and other cells.  
581 (D) The average contact probability across the genome decreased as a function of  
582 genomic distance.

583

584 **Figure 3. FGSCs exhibited specific compartment status**

585 (A) K-means clustering (k=2) of PC1 values of the genome that change A/B  
586 compartment status in FGSCs.  
587 (B) Genes that changed compartment status (A to B or B to A) or that remained the  
588 same (stable) compared with FGSCs (P value by Wilcoxon's test).  
589 (C) IGV snapshots for *Coprs* and *Nanog* showed concordance between their  
590 expression and PC1 values.  
591 (D) Percentages of TADs and TAD boundaries in the genome.  
592 (E) Numbers of TAD types, including stable, merged, split, unique, and rearrangement,  
593 in stem cells.  
594 (F) Comparison of gene expression between TADs and TAD boundaries.  
595 Genome-wide average distribution of RNA-Seq, H3K27ac, H3K4me3, and

596 H3K27me3 reads around the domain boundaries in FGSCs.

597

598 **Figure 4. Cell-type-specific chromatin loops revealed FGSCs signature**

599 (A) Venn diagram showing that most chromatin loops were cell-type-specific in five  
600 types of cells.

601 (B) GO enrichment of cell-type-specific chromatin loops.

602 (C) K-means clustering of H3K4me3 and H3K27ac ChIP-Seq data at promoter and  
603 enhancer regions between FGSCs and SSCs.

604 (D) Chromatin loops gained or lost in FGSCs compared with SSCs.

605

606 **Figure 5. X-Chromosome structure conformation between SSCs and FGSCs**

607 (A) Pearson's correlation heat map showing similarity between FGSCs and SSCs.

608 (B) PC1 values in the X chromosome in FGSCs and SSCs.

609 (C) Spearman's correlation of PC1 values in the X chromosome in FGSCs, SSCs, and  
610 fESCs.

611 (D) Deconvolution of Xi signal from Hi-C data obtained in FGSCs ( $X_a+X_i$ ) by  
612 subtracting the  $X_a$  contribution estimated from SSCs. A small region containing *Dxz4*  
613 showed two domains in FGSCs and deconvoluted Xi, but not in SSCs (blue pixels  
614 represent negative values, red pixels represent positive values).

615 (E) Normalized chromatin interaction maps around *Xist* at 20-kb resolution. Plots  
616 show TAD signal (insulation score).

617

618 **Figure 6. TADs were attenuated and then disappeared during female germline**

619 **cell development**

620 (A) Normalized Hi-C interaction frequencies during female germline cell  
621 development displayed as a heatmap.

622 (B) TAD signals at chromosome 17:33–37 Mb during female germline cell  
623 development.

624 (C) Boxplot of absolute DI values during female germline cell development. P value  
625 calculated by Kruskal-Wallis test.

626 (D) Average insulation scores (IS) of different stages in female germline cell  
627 development at TADs (defined in FGSCs) and nearby regions.

628 (E) Relative proportions of *cis* interactions at different genome distances versus total  
629 paired loci.

630 (F) Graphical model for dynamic changes in TADs during female germline cell  
631 development.

632

633 **Figure 7. Identification of conserved allelic chromatin structures**

634 (A) Hierarchical clustering of PC1 values based on maternal (black) and paternal (red)  
635 genome architectures. Reference shown in green.

636 (B) Example of conserved compartment region at chromosome 19:34–60 Mb during  
637 early embryonic development.

638 (C) Numbers of conserved compartment regions in paternal and maternal genomes.

639 (D) Venn diagram showing overlap of conserved compartment regions between

640 paternal and maternal genomes.

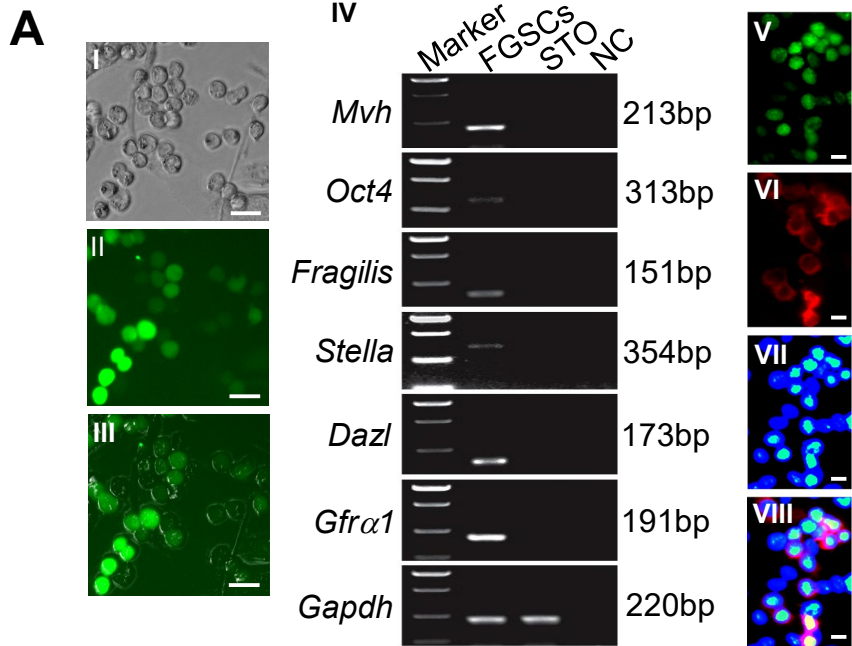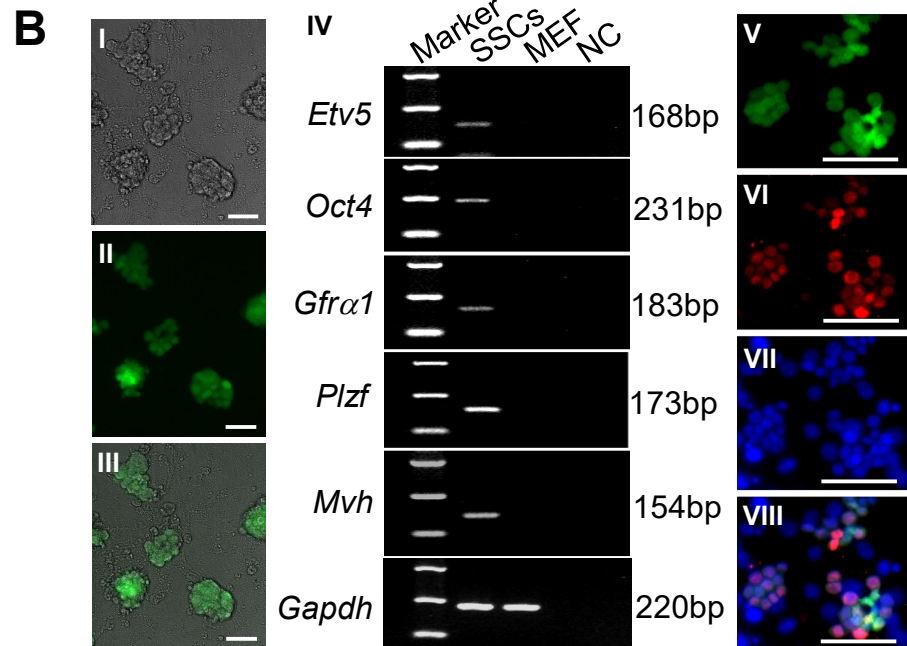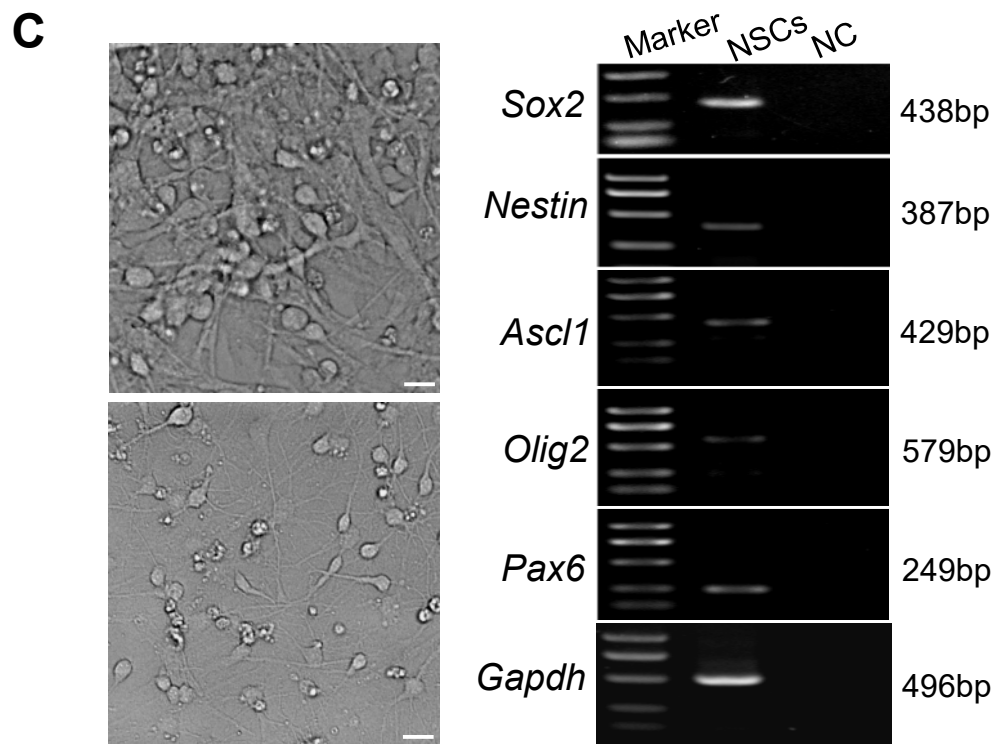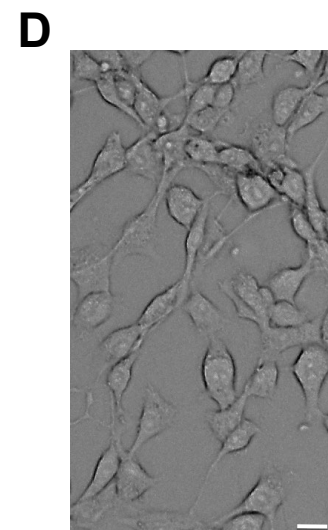

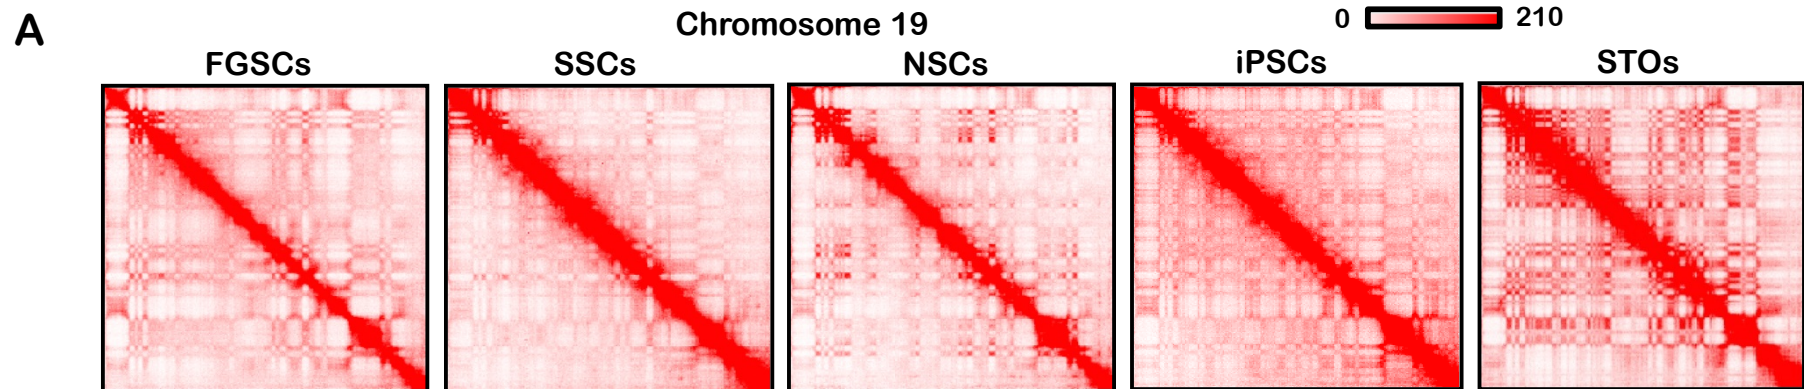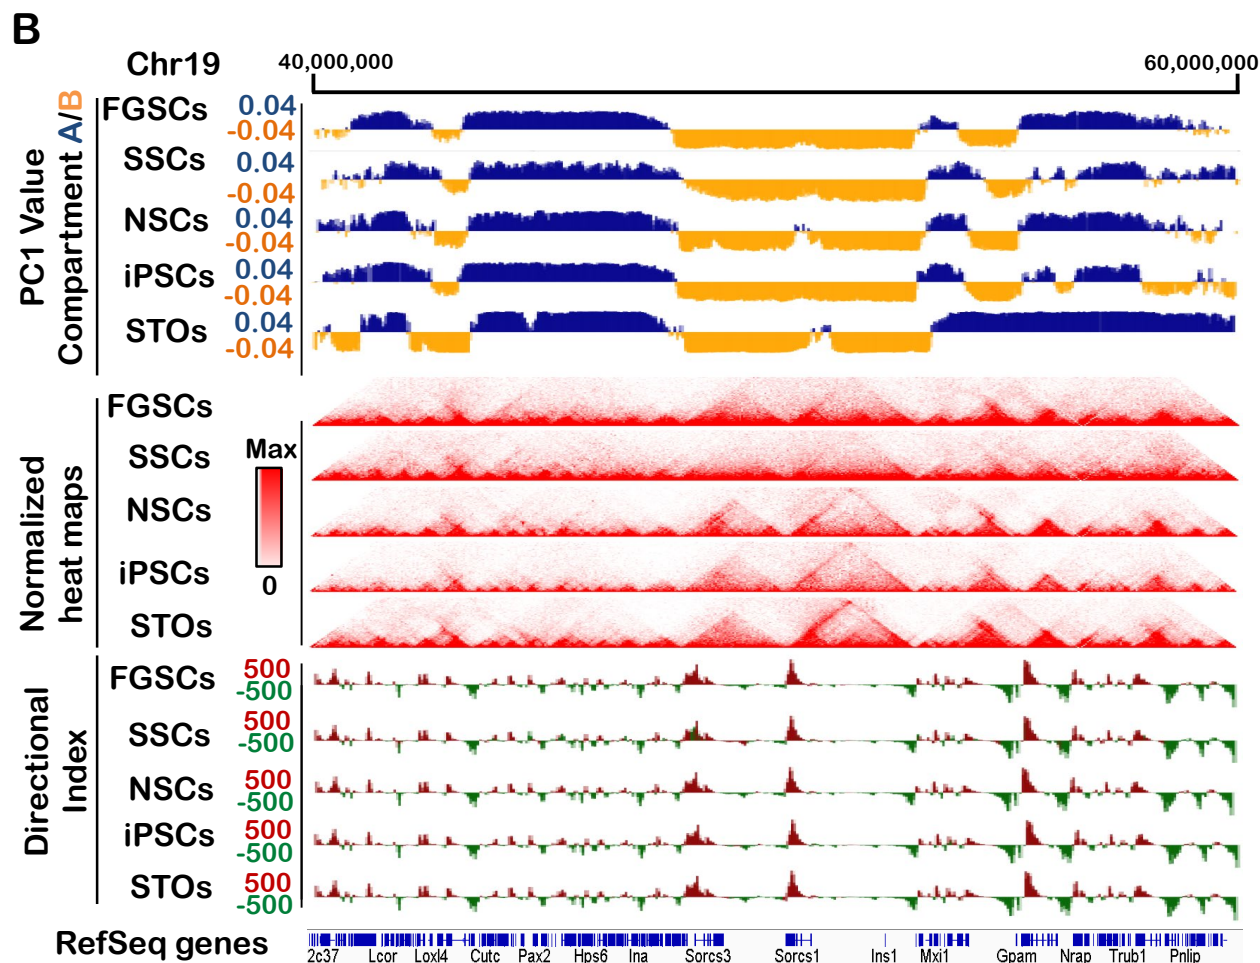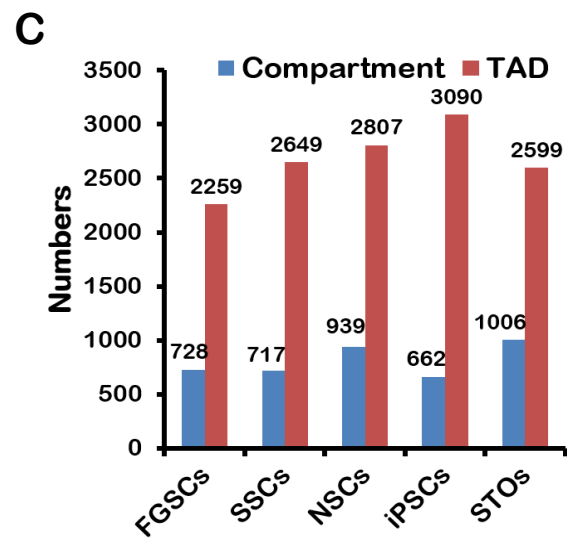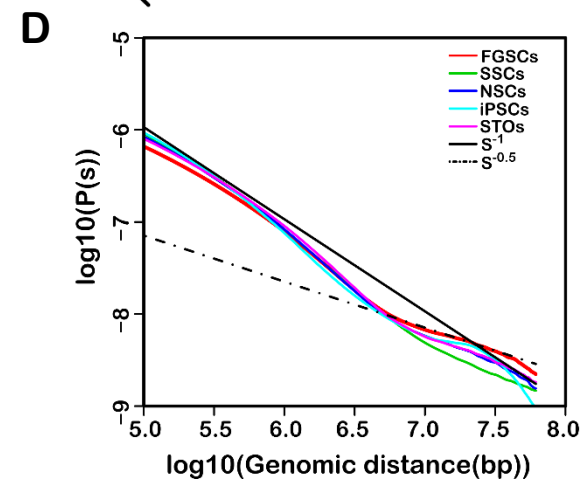



**A**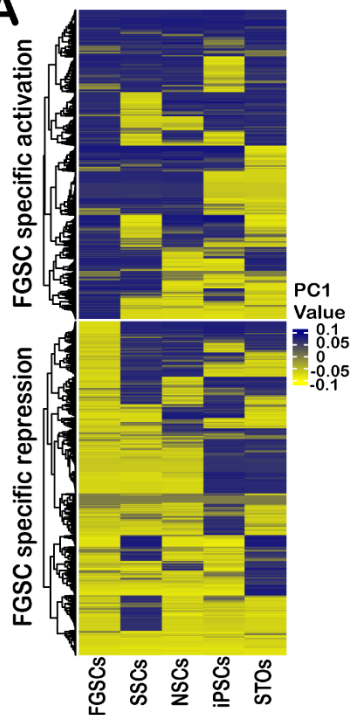**B**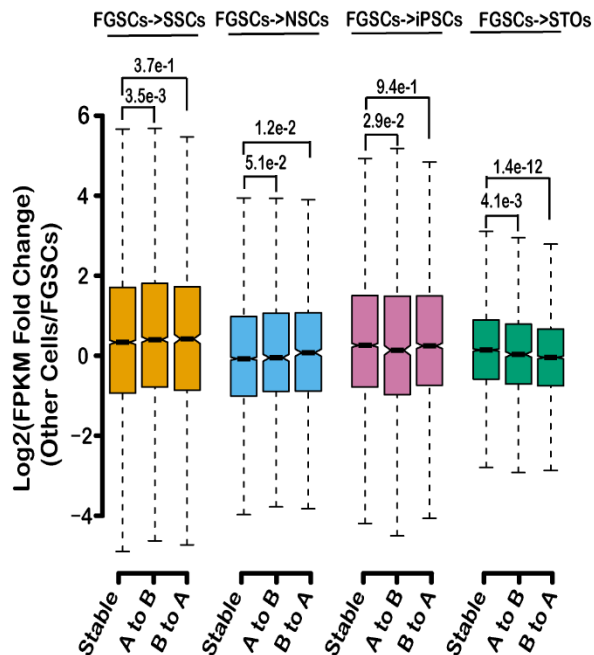**C**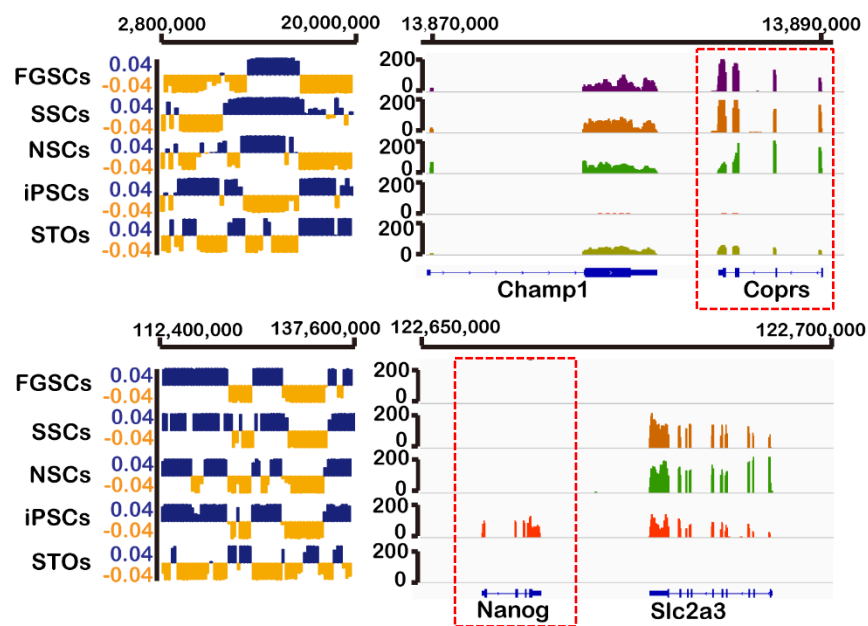**D**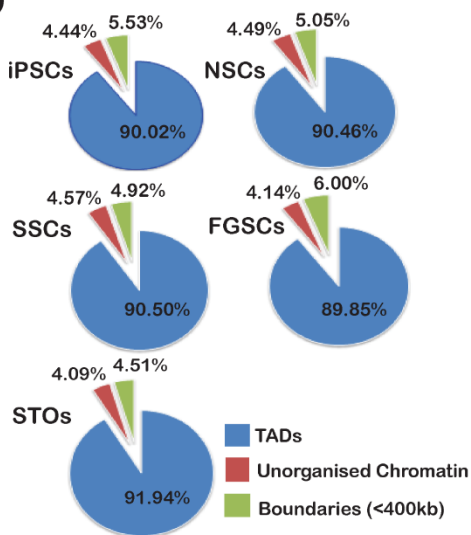**E**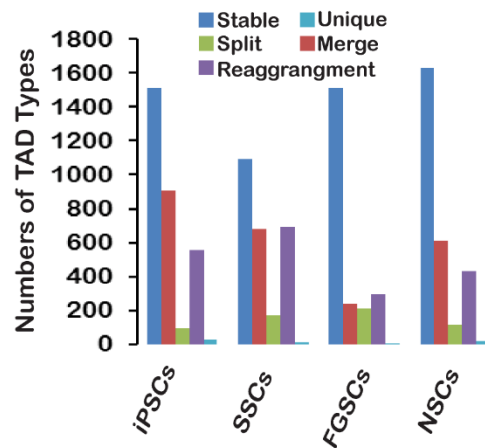**F**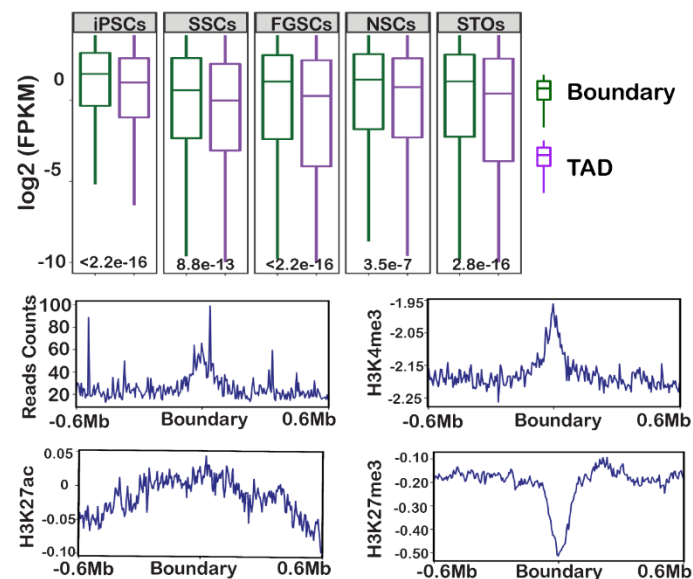

A

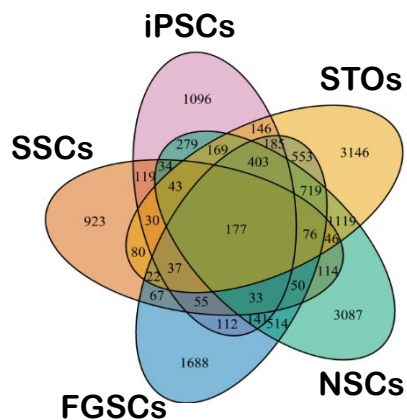

B

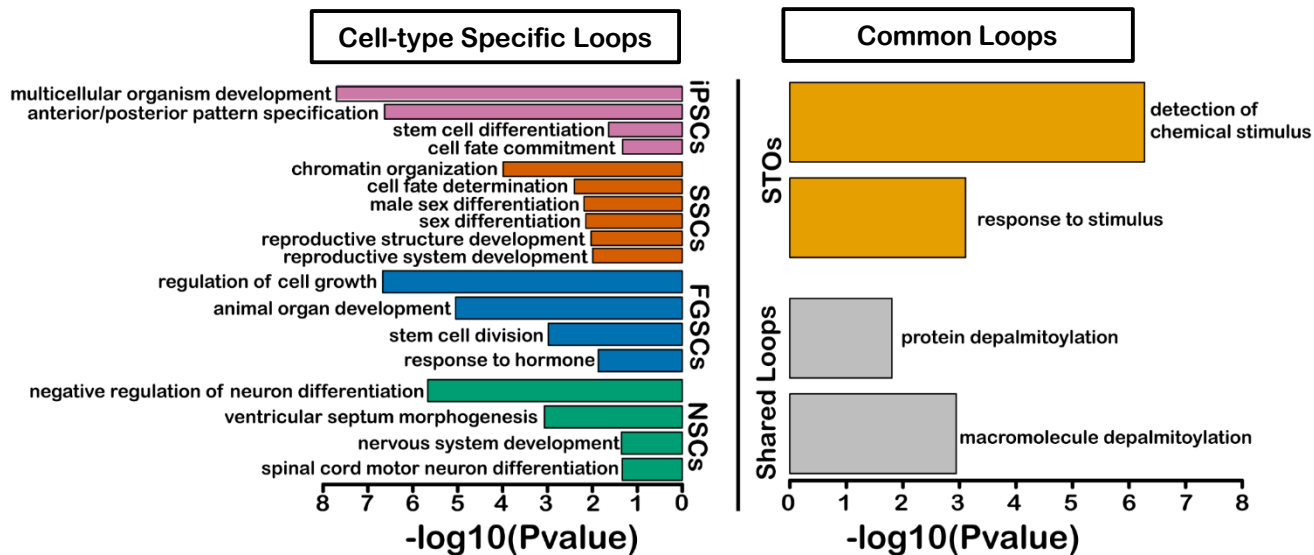

C

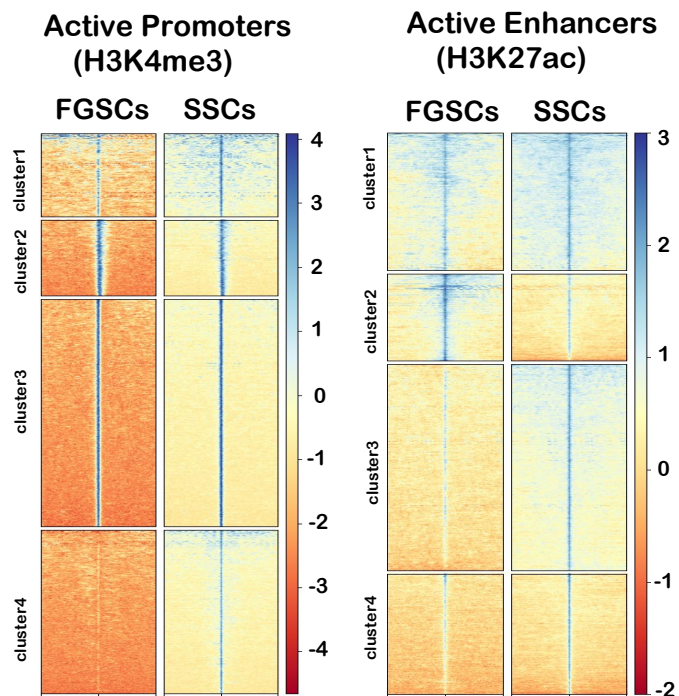

D

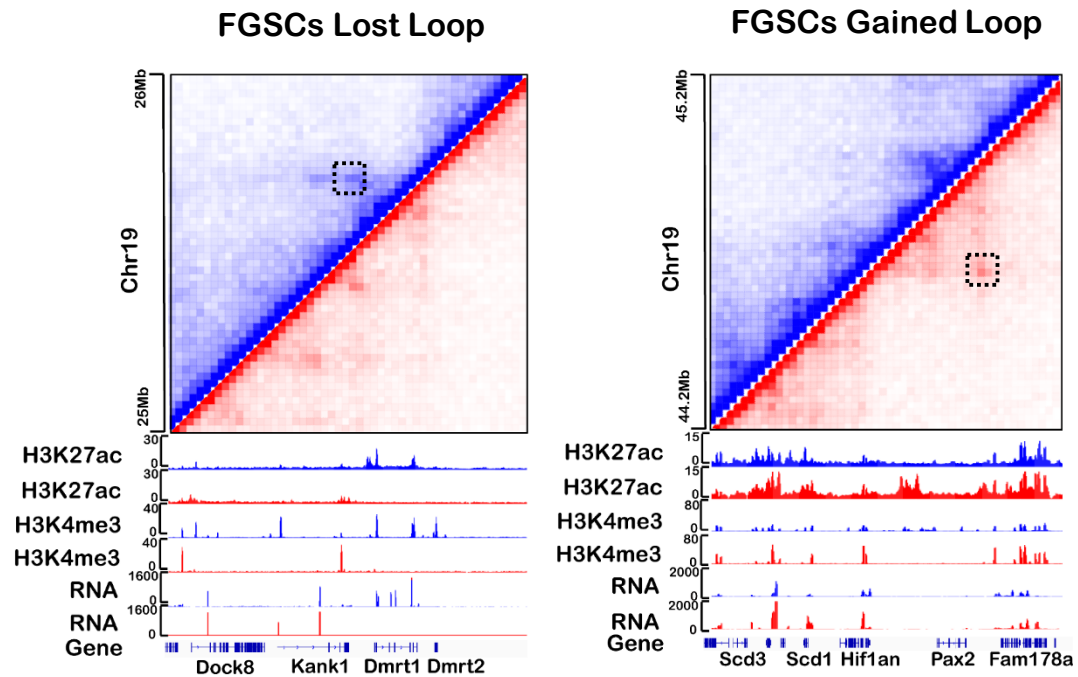

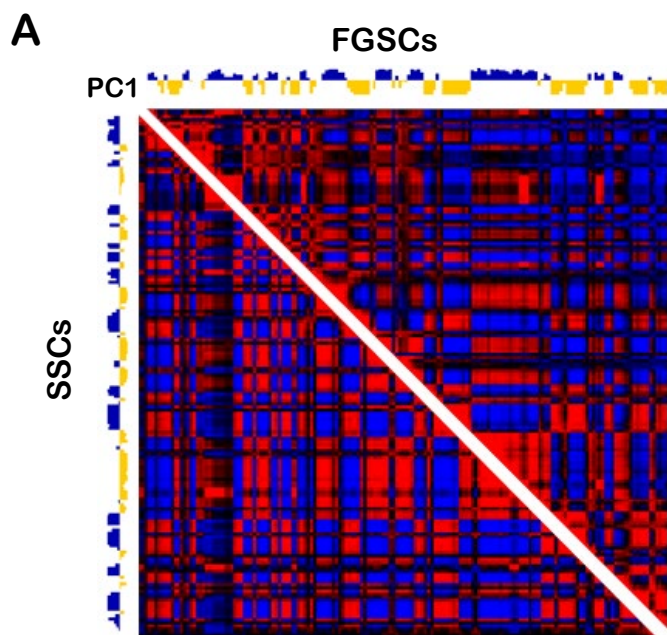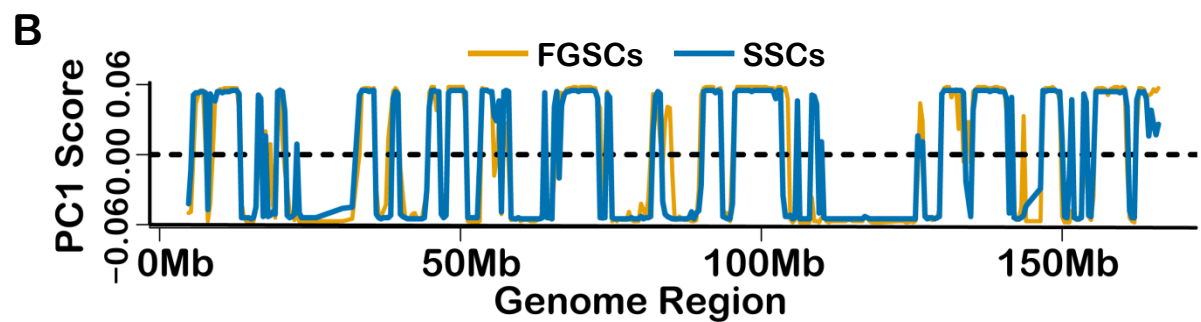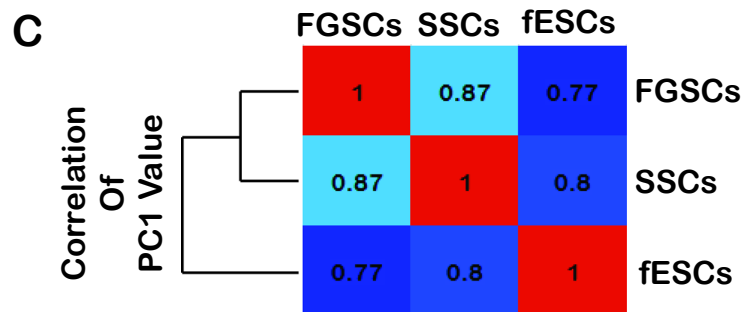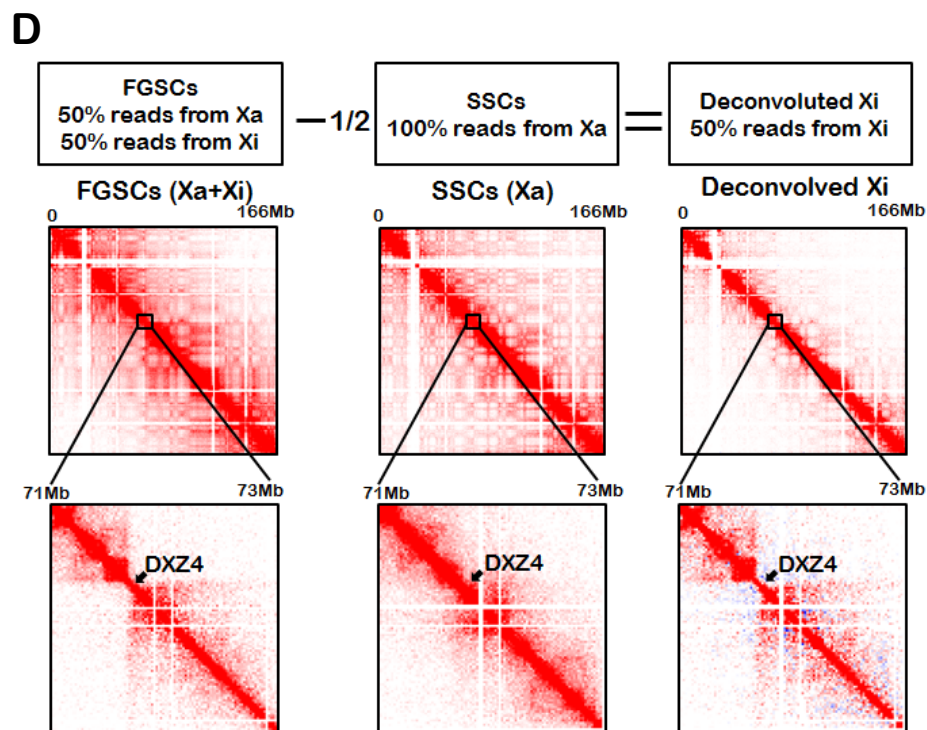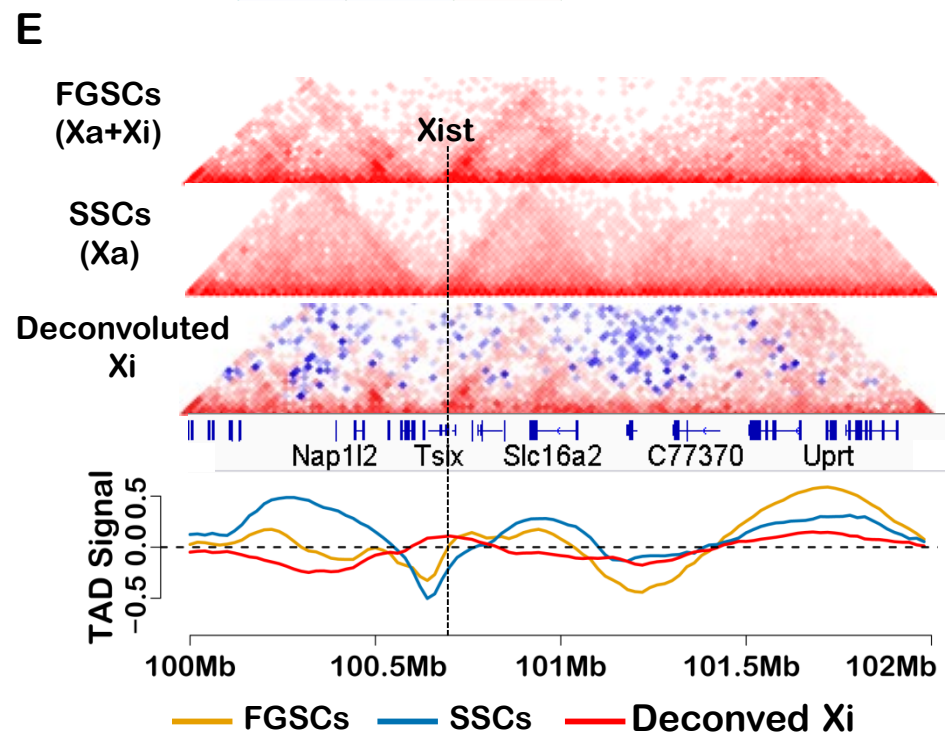

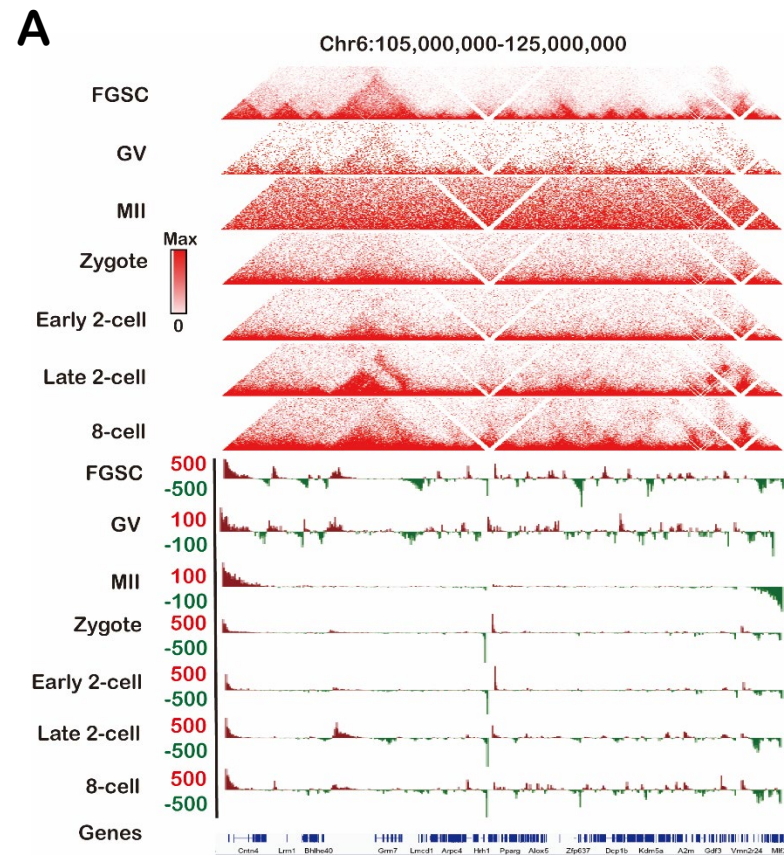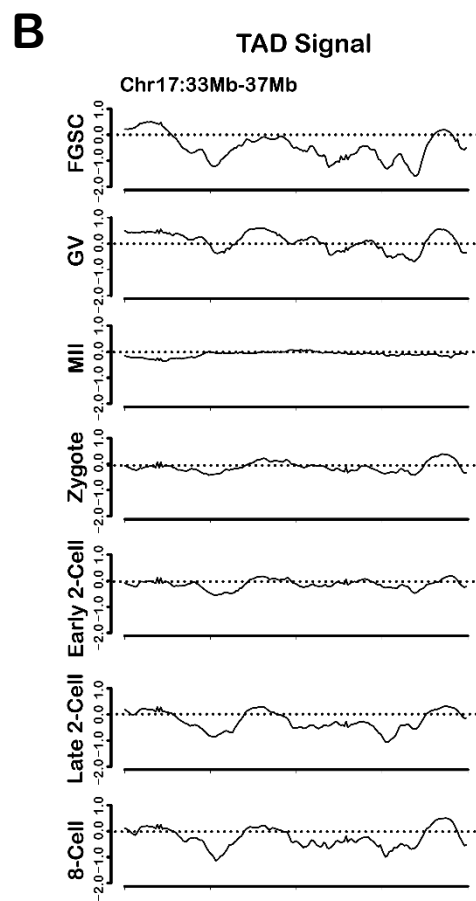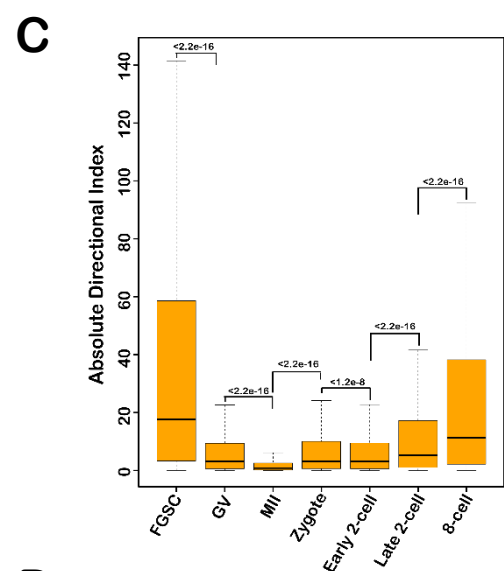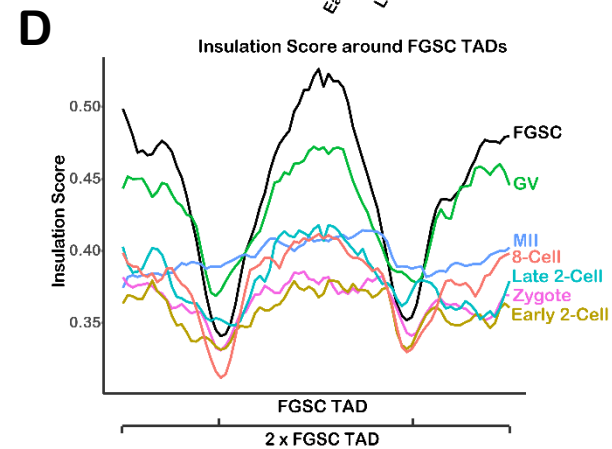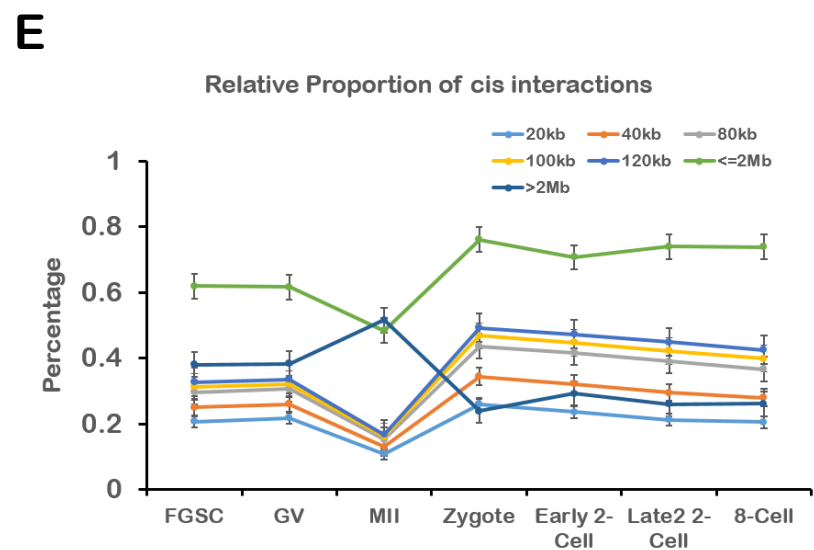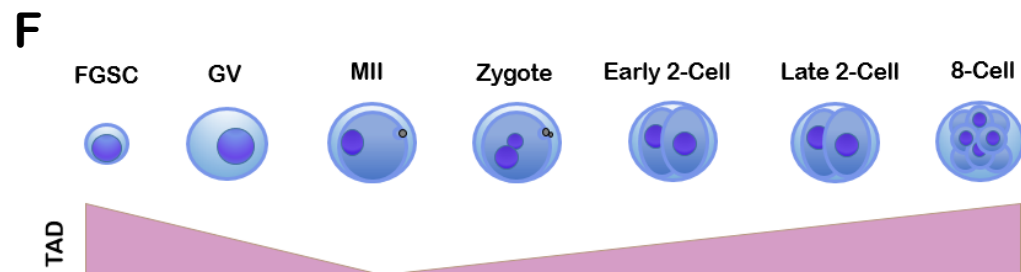

**A**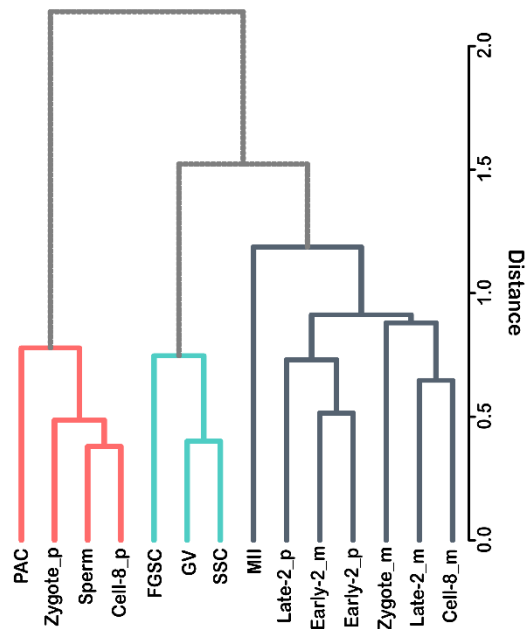**B**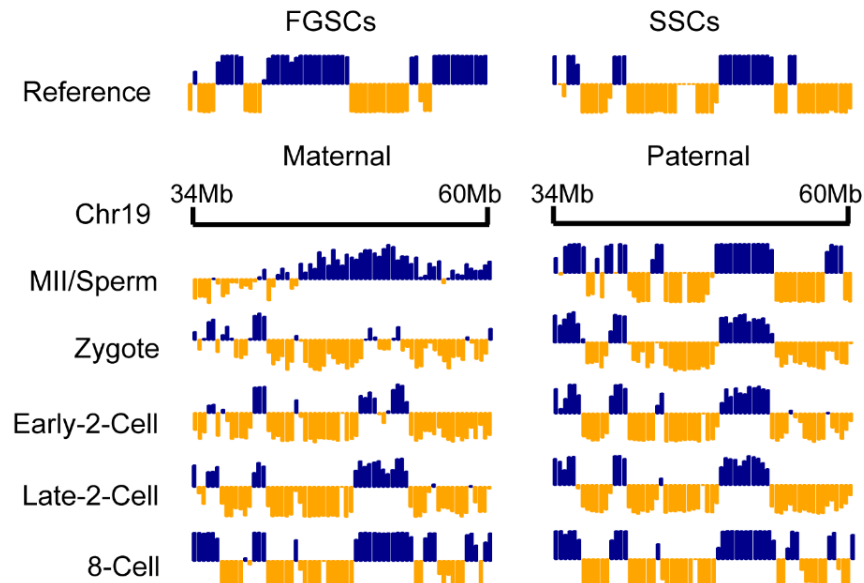**C**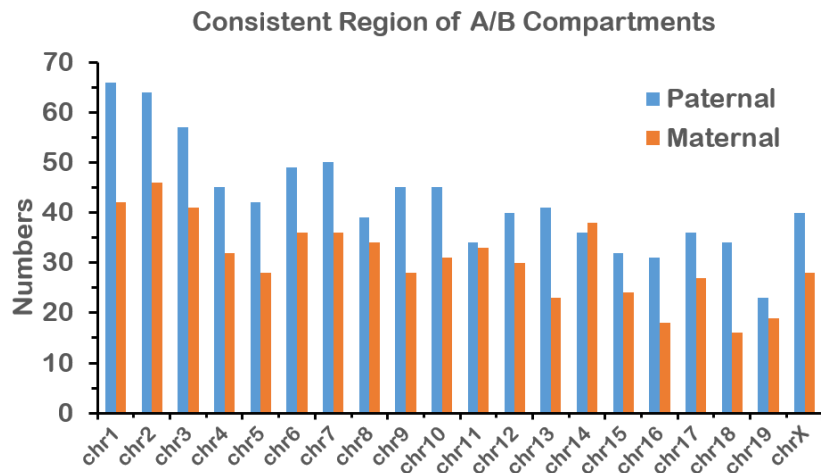**D**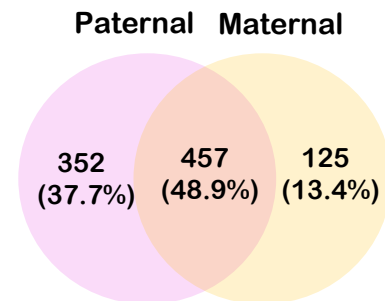

Source: https://www.biorxiv.org/content/biorxiv/early/2019/09/30/787689.full.pdf
